# Supplementary material for: The Epidemiological and Economic Impact of a Cell-Based Quadrivalent Influenza Vaccine in Adults in the US: A Dynamic Modeling Approach
Source: MDPI journal article supplement (doi:10.3390/vaccines9101095), 2021-09-28
Supplement: s1 [file s1]

**Table S1: Percentage of strains circulation in the United States from 2013 to 2018** reported by the Centers for Disease Control and Prevention in the Weekly US Influenza reports.

| <b>Season</b>    | <b>A/H1N1</b> | <b>A/H3N2</b> | <b>B Yamagata</b> | <b>B Victoria</b> |
|------------------|---------------|---------------|-------------------|-------------------|
| <b>2013-2014</b> | 66.7%         | 20.5%         | 6.0%              | 6.7%              |
| <b>2014-2015</b> | 0.5%          | 81.3%         | 9.1%              | 9.1%              |
| <b>2015-2016</b> | 62.0%         | 18.1%         | 6.3%              | 13.6%             |
| <b>2016-2017</b> | 2.5%          | 78.6%         | 5.3%              | 13.6%             |
| <b>2017-2018</b> | 11.8%         | 66.0%         | 2.4%              | 19.9%             |

**Table S2: Influenza economic and clinical outcome parameters**

| Item                                             | Distribution | mean   | Param1 | Param2 |
|--------------------------------------------------|--------------|--------|--------|--------|
| number of GP visits per case LR in 18-49         | Beta         | 0.31   | 338    | 752    |
| number of GP visits per case LR in 50-64         | Beta         | 0.31   | 338    | 752    |
| number of GP visits per case HR in 18-49         | weight       | 2      |        |        |
| number of GP visits per case HR in 50-64         | weight       | 2      |        |        |
| number of hospitalizations per cases LR in 18-49 | Beta         | 0.0042 | 9      | 2124   |
| number of hospitalizations per cases LR in 50-64 | Beta         | 0.0193 | 8.9    | 452    |
| number of hospitalizations per cases HR in 18-49 | Beta         | 0.0042 | 9      | 2124   |
| number of hospitalizations per cases HR in 50-64 | Beta         | 0.0193 | 8.9    | 452    |
| number of deaths per cases LR in 18-49           | Beta         | 0.0001 | 9      | 99981  |
| number of deaths per cases LR in 50-64           | Beta         | 0.0013 | 8.9    | 6599   |
| number of deaths per cases HR in 18-49           | Beta         | 0.0001 | 9      | 99981  |
| number of deaths per cases HR in 50-64           | Beta         | 0.0013 | 8.9    | 6599   |
| GP cost per consultation LR in 18-49             | Lognormal    | 158    | 5      | 0.03   |
| GP cost per consultation LR in 50-64             | Lognormal    | 190    | 5.2    | 0.04   |
| GP cost per consultation HR in 18-49             | Lognormal    | 918    | 6.8    | 0.036  |
| GP cost per consultation HR in 50-64             | Lognormal    | 928    | 6.8    | 0.018  |
| Hospital cost per episode LR in 18-49            | Lognormal    | 24076  | 10     | 0.22   |
| Hospital cost per episode LR in 50-64            | Lognormal    | 28245  | 10     | 0.24   |
| Hospital cost per episode HR in 18-49            | Lognormal    | 60419  | 11     | 0.2    |
| Hospital cost per episode HR in 50-64            | Lognormal    | 52300  | 11     | 0.075  |
| QALY loss per nonfatal ILI case in 18-49         | Normal       | 0.007  | 0.007  | 0.0008 |
| QALY loss per nonfatal ILI case in 50-64         | Normal       | 0.007  | 0.007  | 0.0008 |
| QALY loss per hospitalization in 50-64           | Normal       | 0.013  | 0.013  | 0.0015 |
| QALY loss per hospitalization in 65+             | Normal       | 0.013  | 0.013  | 0.0015 |
| Lost Workday cases in 18-49                      | Gamma        | 0.5    | 3.8    | 0.13   |
| Lost Workday cases in 50-64                      | Gamma        | 0.5    | 3.8    | 0.13   |
| Lost workday outpatient visit LR in 18-49        | Gamma        | 1      | 3.8    | 0.26   |
| Lost workday outpatient visit LR in 50-64        | Gamma        | 2      | 3.8    | 0.52   |
| Lost workday outpatient visit HR in 18-49        | Gamma        | 2      | 3.8    | 0.52   |
| Lost workday outpatient visit HR in 50-64        | Gamma        | 4      | 3.8    | 1      |
| Lost workday outpatient visit HR in 65+          | Gamma        | 7      | 7      | 1.8    |
| Lost Workdays Hosp LR in 18-49                   | Gamma        | 12     | 3.8    | 3.1    |
| Lost Workdays Hosp LR in 50-64                   | Gamma        | 13     | 3.8    | 3.4    |
| Lost Workdays Hosp HR in 18-49                   | Gamma        | 21     | 15.94  | 1.4    |
| Lost Workdays Hosp HR in 50-64                   | Gamma        | 24     | 17.3   | 1.47   |

Note: For Beta distribution, param1 and param2 stand for the shape parameters  $a$  and  $b$ , for Lognormal they stand for the log of the mean and log of the standard deviation, for normal distributions they stand for the bounds of the 95%CI, and for Gamma distributions they stand for the shape and scale parameters.

**Table S3: Influenza vaccination coverage rate in the US in 2018-2019** according to the Centers for Disease Control and Prevention. Flu Vaccination Coverage, United States, 2018–19 Influenza Season. Available from: <https://www.cdc.gov/flu/fluview/covage-1819estimates.htm>.

| Age group | US vaccination coverage rate in 2018-2019 |
|-----------|-------------------------------------------|
| 6-23 m    | 73.40%                                    |
| 2-4yrs    | 73.40%                                    |
| 5-12yrs   | 63.60%                                    |
| 13-17yrs  | 52.20%                                    |
| 18-49yrs  | 34.90%                                    |
| 50-64yrs  | 47.30%                                    |
| 65+ yrs   | 68.10%                                    |

**Table S4: Vaccine effectiveness, relative effectiveness distribution probabilities.** Random draws are bounded to 0% and 100%, mean and standard deviation are computed from the bounds of the 95%CI.

|                                       | Age   | Item        | Distribution | lower bound<br>of 95%CI | upper bound<br>of 95%CI |
|---------------------------------------|-------|-------------|--------------|-------------------------|-------------------------|
| <b>Vaccine effectiveness match</b>    | 18-49 | A/H1N1pdm09 | Normal       | 18%                     | 67%                     |
|                                       |       | A/H3N2      | Normal       | 0%                      | 93%                     |
|                                       |       | B Victoria  | Normal       | 43%                     | 69%                     |
|                                       |       | B Yamagata  | Normal       | 43%                     | 69%                     |
|                                       | 50-64 | A/H1N1pdm09 | Normal       | 0%                      | 67%                     |
|                                       |       | A/H3N2      | Normal       | 0%                      | 98%                     |
|                                       |       | B Victoria  | Normal       | 24%                     | 60%                     |
|                                       |       | B Yamagata  | Normal       | 24%                     | 60%                     |
| <b>Vaccine effectiveness mismatch</b> | 18-49 | A/H3N2      | Normal       | 0%                      | 41%                     |
|                                       | 50-64 | A/H3N2      | Normal       | 0%                      | 39%                     |
| <b>RVE</b>                            | 18-49 | -           | Normal       | 14%                     | 37%                     |
|                                       | 50-64 | -           | Normal       | 14%                     | 37%                     |
